# Supplementary material for: Surface engineering of nanoflower-like MoS2 decorated porous Si3N4 ceramics for electromagnetic wave absorption
Source: Royal Society of Chemistry journal article supplement (doi:10.1039/d3ta00122a), 2023-01-01
Supplement: d3ta00122a1.pdf [file d3ta00122a1.pdf]

## Supplementary Information

### **Surface engineering of nanoflower-like MoS<sub>2</sub> decorated porous Si<sub>3</sub>N<sub>4</sub> ceramics for electromagnetic wave absorption**

Jialin Bai,<sup>ab</sup> Shijie Huang,<sup>ab</sup> Xiumin Yao,<sup>\*a</sup> Xuejian Liu<sup>\*a</sup> and Zhengren Huang<sup>\*a</sup>

<sup>a</sup> State Key Laboratory of High Performance Ceramics and Superfine Microstructures, Shanghai Institute of Ceramics, Chinese Academy of Sciences, Shanghai 200050, China

<sup>b</sup> Center of Materials Science and Optoelectronic Engineering, University of Chinese Academy of Sciences, Beijing 100049, China

\* Corresponding Authors: xmyao@mail.sic.ac.cn (Xiumin Yao), xjliu@mail.sic.ac.cn (Xuejian Liu), zhrhuang@mail.sic.ac.cn (Zhengren Huang).

## Materials and Characterization

### Materials

Commercial  $\text{Si}_3\text{N}_4$  powder was used as starting material.  $\text{Y}_2\text{O}_3$  and  $\text{Al}_2\text{O}_3$  were used as sintering additives. Mono-dispersed poly methyl methacrylate (PMMA,  $d_{50} \sim 30 \mu\text{m}$ ) micro-balls were used as a pore-forming agent. Sodium molybdate dihydrate ( $\text{Na}_2\text{MoO}_4 \cdot 2\text{H}_2\text{O}$ ) and thioacetamide ( $\text{C}_2\text{H}_5\text{NS}$ ) were used for the synthesis of  $\text{MoS}_2$ . All chemicals were of analytical grade and were used as received without further purification.

### Characterization

The phase composition of the samples was analyzed via X-ray diffraction (XRD, Cu K $\alpha$  as radiation, Germany). The morphology of the fracture surface was observed using field emission scanning electron microscope (SEM, Hitachi SU8220, Japan) and transmission electron microscopy (TEM, JEM-2100F). Apparent porosity was measured by the Archimedes method. The surface element composition and its chemical states were determined by X-ray photoelectron spectroscopy (XPS, Thermo Fisher Scientific ESCALAB 250). Raman spectra were obtained on a LabRam HR800 with a visible laser (532 nm) to characterize the structure of the samples. The vector network analyzer (VNA, Agilent E5071C; China) was carried out to test the complex permittivity of the samples with dimensions of 22.86 mm  $\times$  10.16 mm  $\times$  3 mm in the frequency range of 8.2-12.4 GHz.

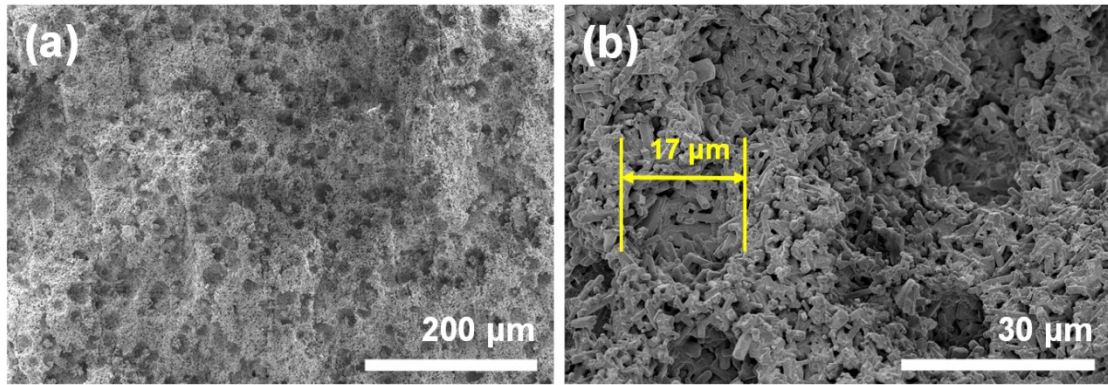

**Figure S1.** The fracture surfaces of porous  $\text{Si}_3\text{N}_4$  ceramic.

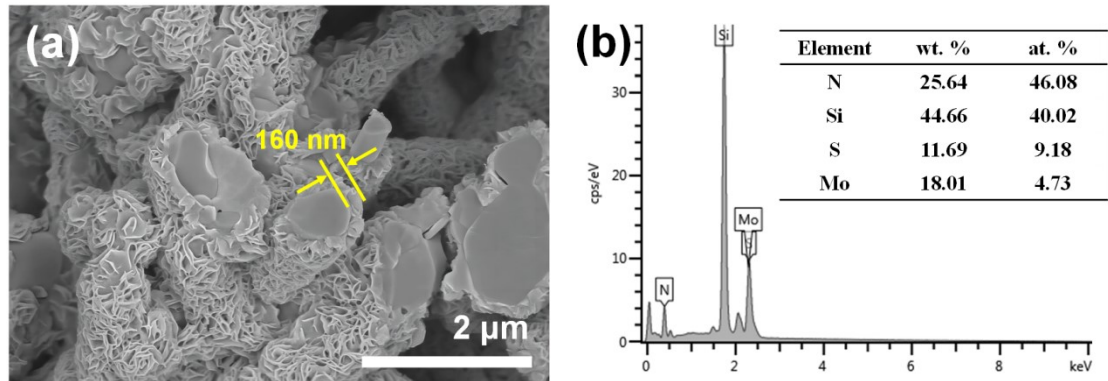

**Figure S2.** (a) The fracture surface and (b) EDS results of  $\text{MoS}_2/\text{Si}_3\text{N}_4$ -1.70.

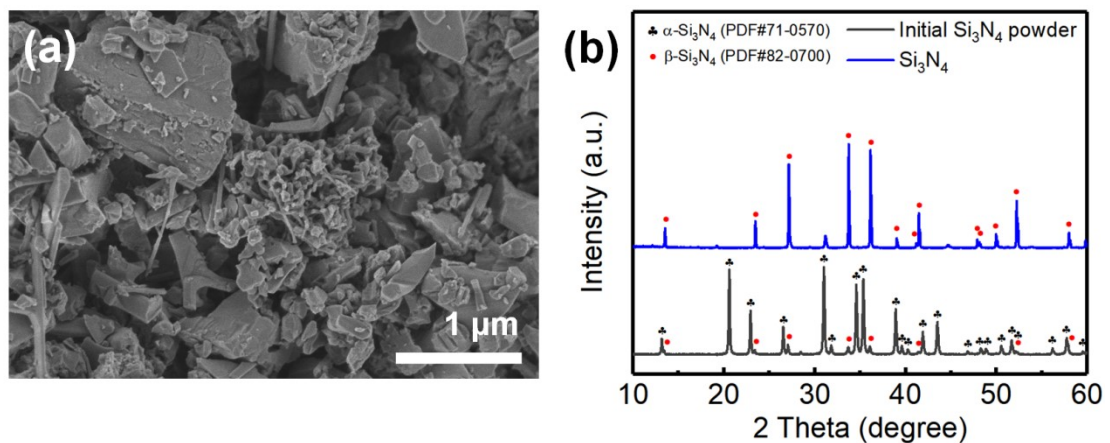

**Figure S3.** (a) The microstructure of initial  $\text{Si}_3\text{N}_4$  powder. (b) XRD pattern of initial  $\text{Si}_3\text{N}_4$  powder and porous  $\text{Si}_3\text{N}_4$  ceramics.

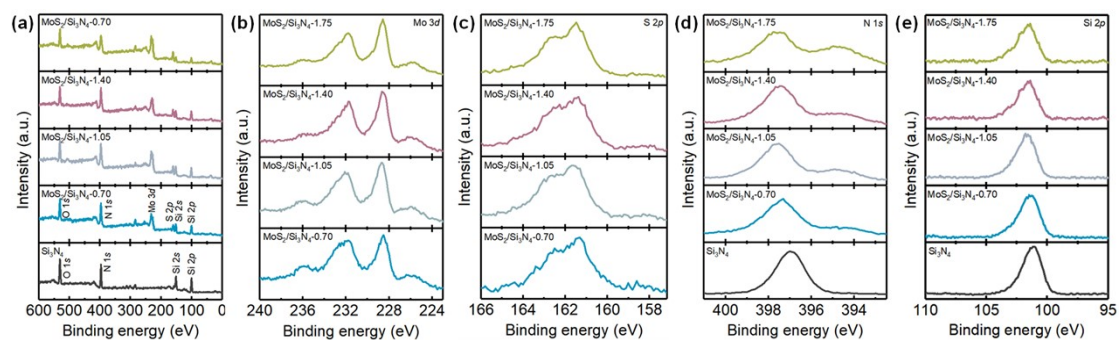

**Figure S4.** (a) XPS survey spectrum and high resolution XPS spectra of (b) Mo 3d, (c)

S 2p, (d) N 1s, and (e) Si 2p.

**Table S1.** Summary of the average real part ( $\epsilon'$ ), imaginary part ( $\epsilon''$ ) of complex permittivity, and dielectric loss tangent ( $\tan \delta_\epsilon$ ) for different samples

| Sample                                                 | $\epsilon'$ | $\epsilon''$ | $\tan \delta_\epsilon$ |
|--------------------------------------------------------|-------------|--------------|------------------------|
| MoS <sub>2</sub> /Si <sub>3</sub> N <sub>4</sub> -0.70 | 3.52        | 0.92         | 0.26                   |
| MoS <sub>2</sub> /Si <sub>3</sub> N <sub>4</sub> -1.05 | 3.82        | 1.94         | 0.51                   |
| MoS <sub>2</sub> /Si <sub>3</sub> N <sub>4</sub> -1.40 | 4.64        | 2.69         | 0.58                   |
| MoS <sub>2</sub> /Si <sub>3</sub> N <sub>4</sub> -1.75 | 5.72        | 3.64         | 0.64                   |
